# Supplementary material for: Expression of Ceramide-Metabolizing Enzymes in the Heart Adipose Tissue of Cardiovascular Disease Patients
Source: MDPI journal article supplement (doi:10.3390/ijms24119494), 2023-05-30

**Supplementary Figure S3.** Uncropped Western blot of SPTLC2 expression in subcutaneous adipose tissue (SAT), epicardial adipose tissue (EAT), and perivascular adipose tissue (PVAT) in patients with coronary artery disease (CAD)

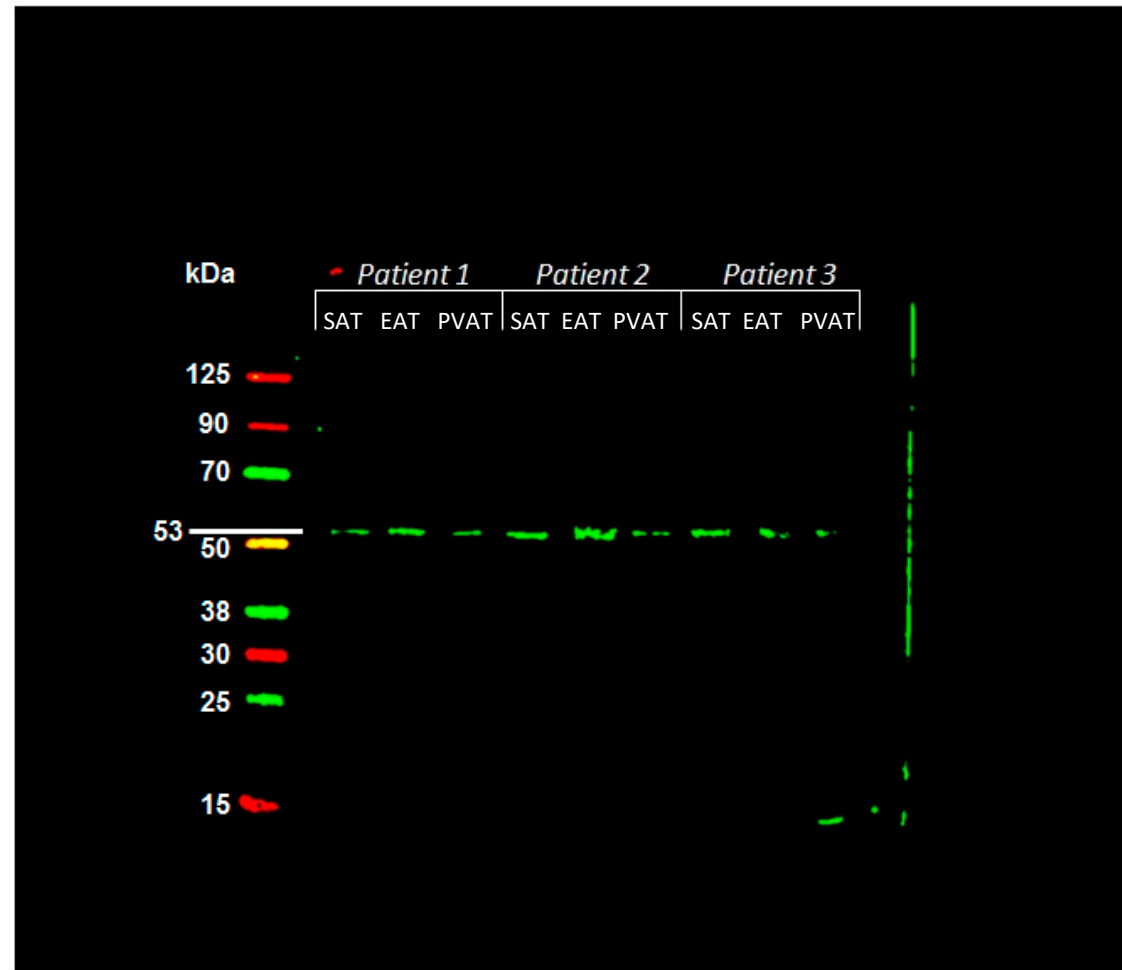



**Supplementary Figure S5.** Uncropped Western blot of CERS6 expression in subcutaneous adipose tissue (SAT), epicardial adipose tissue (EAT), and perivascular adipose tissue (PVAT) in patients with coronary artery disease (CAD)

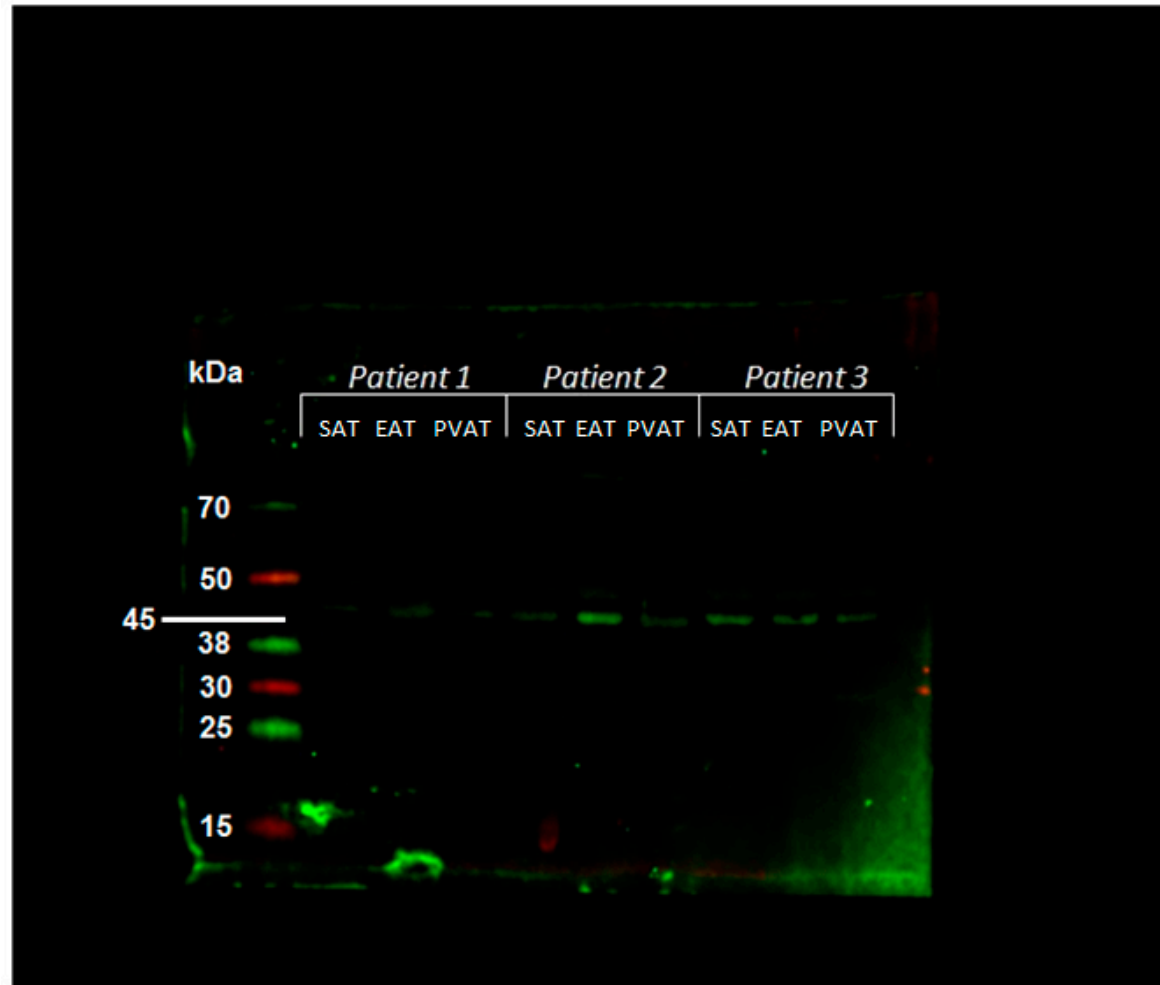

**Supplementary Figure S6.** Uncropped Western blot of CERS6 expression in subcutaneous adipose tissue (SAT), epicardial adipose tissue (EAT), and perivascular adipose tissue (PVAT) in patients with valvular heart disease (VHD)

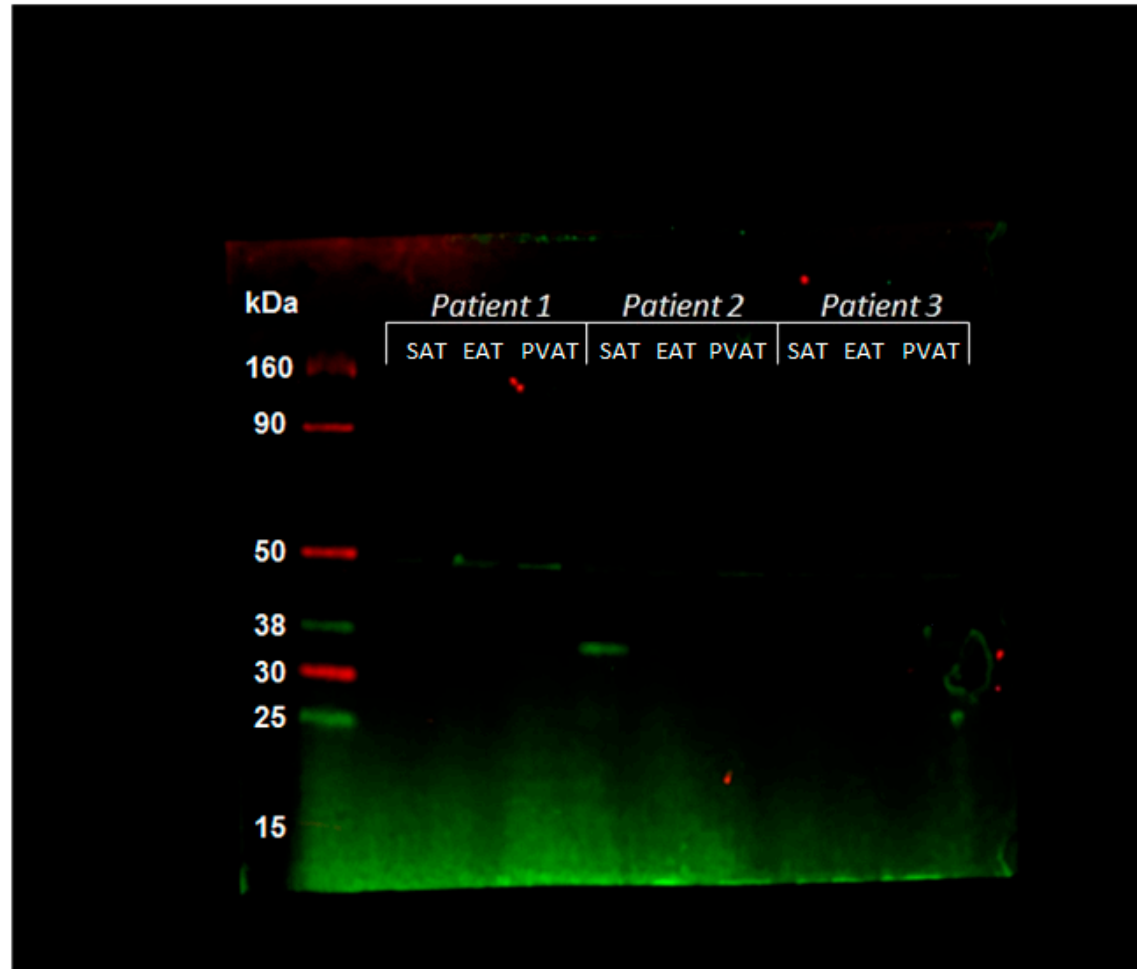



**Supplementary Figure S8.** Uncropped Western blot of DEGS1 expression in subcutaneous adipose tissue (SAT), epicardial adipose tissue (EAT), and perivascular adipose tissue (PVAT) in patients with valvular heart disease (VHD)

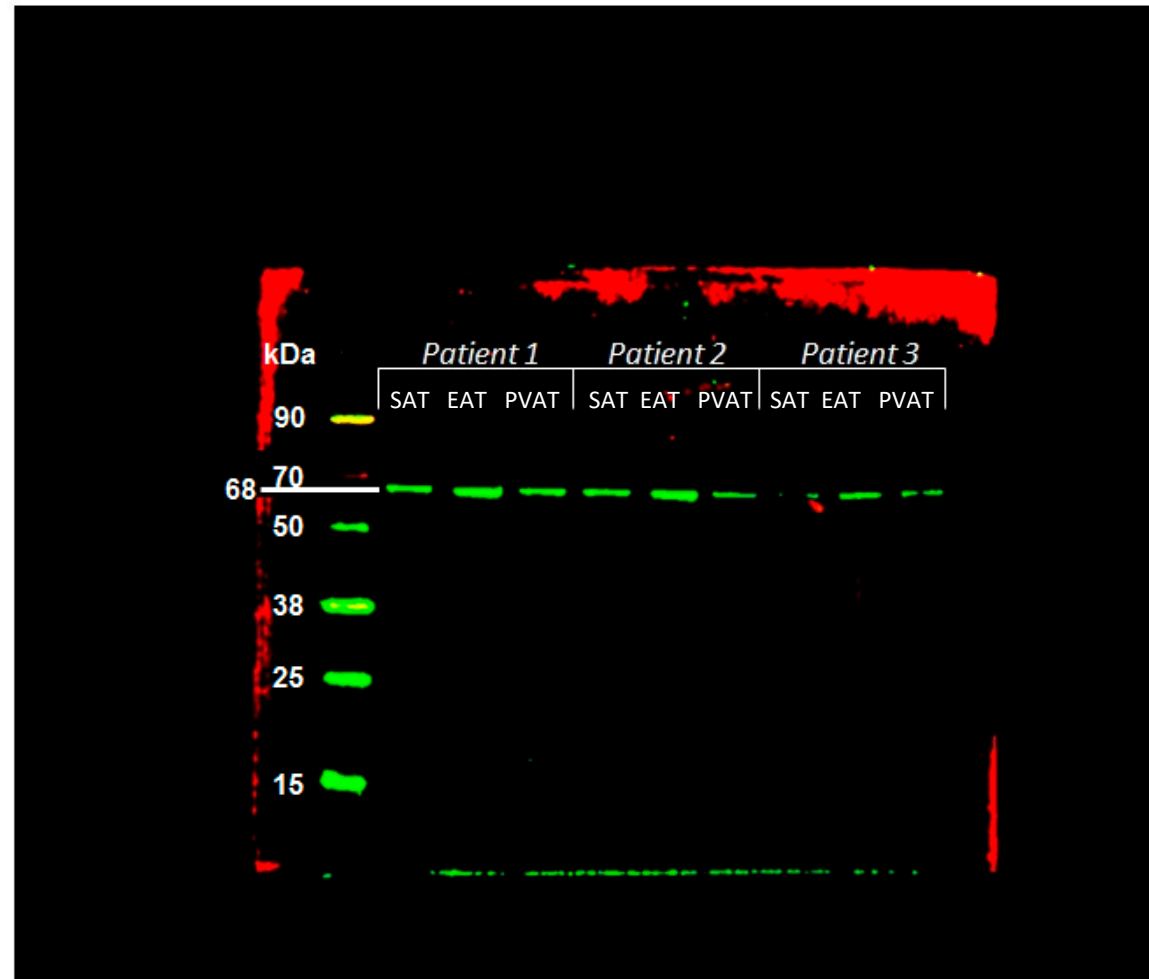









**Supplementary Figure S12.** Uncropped Western blot of NSMase2 expression in subcutaneous adipose tissue (SAT), epicardial adipose tissue (EAT), and perivascular adipose tissue (PVAT) in patients with valvular heart disease (VHD)

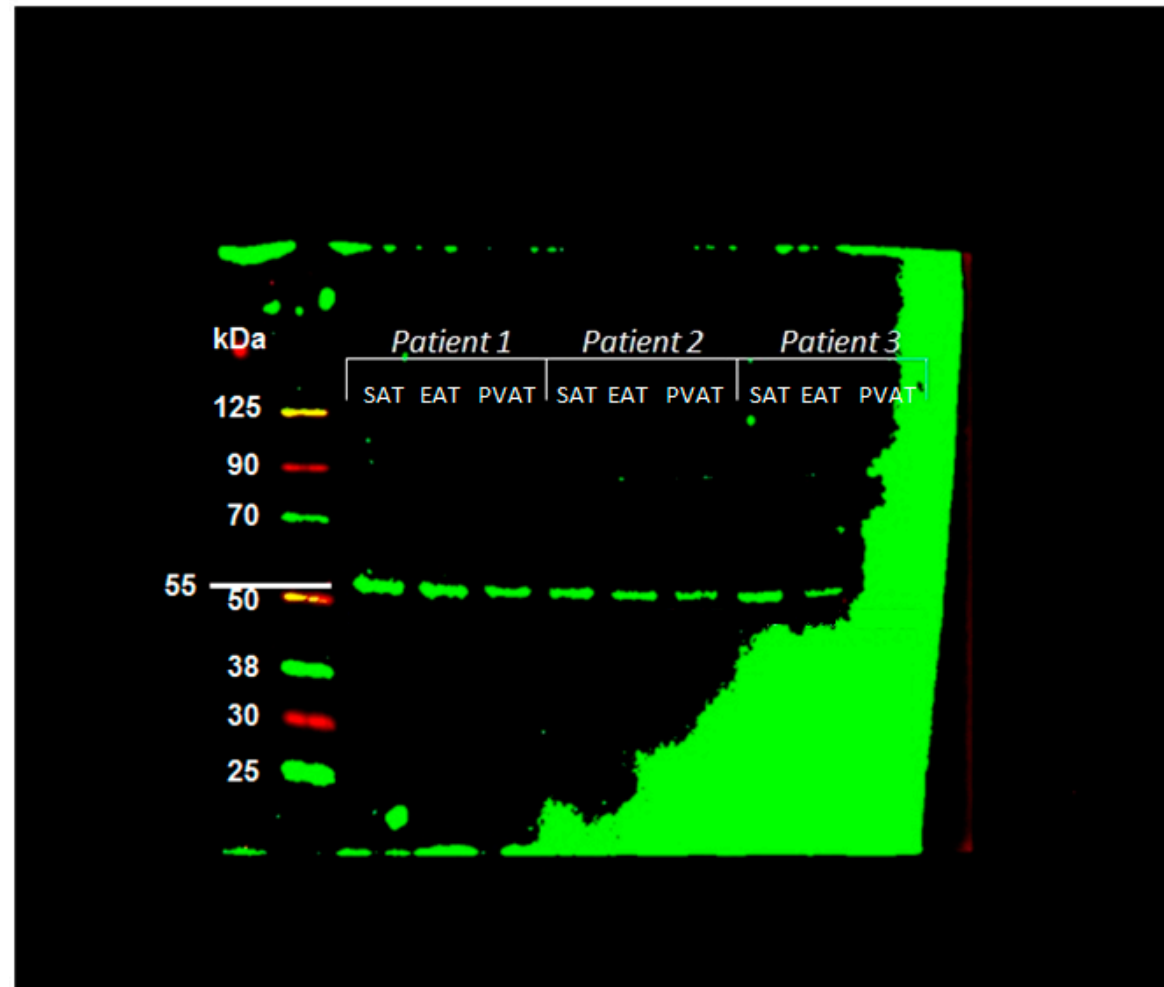







**Supplementary Figure S16.** Uncropped Western blot of SGMS1 expression in subcutaneous adipose tissue (SAT), epicardial adipose tissue (EAT), and perivascular adipose tissue (PVAT) in patients with valvular heart disease (VHD)

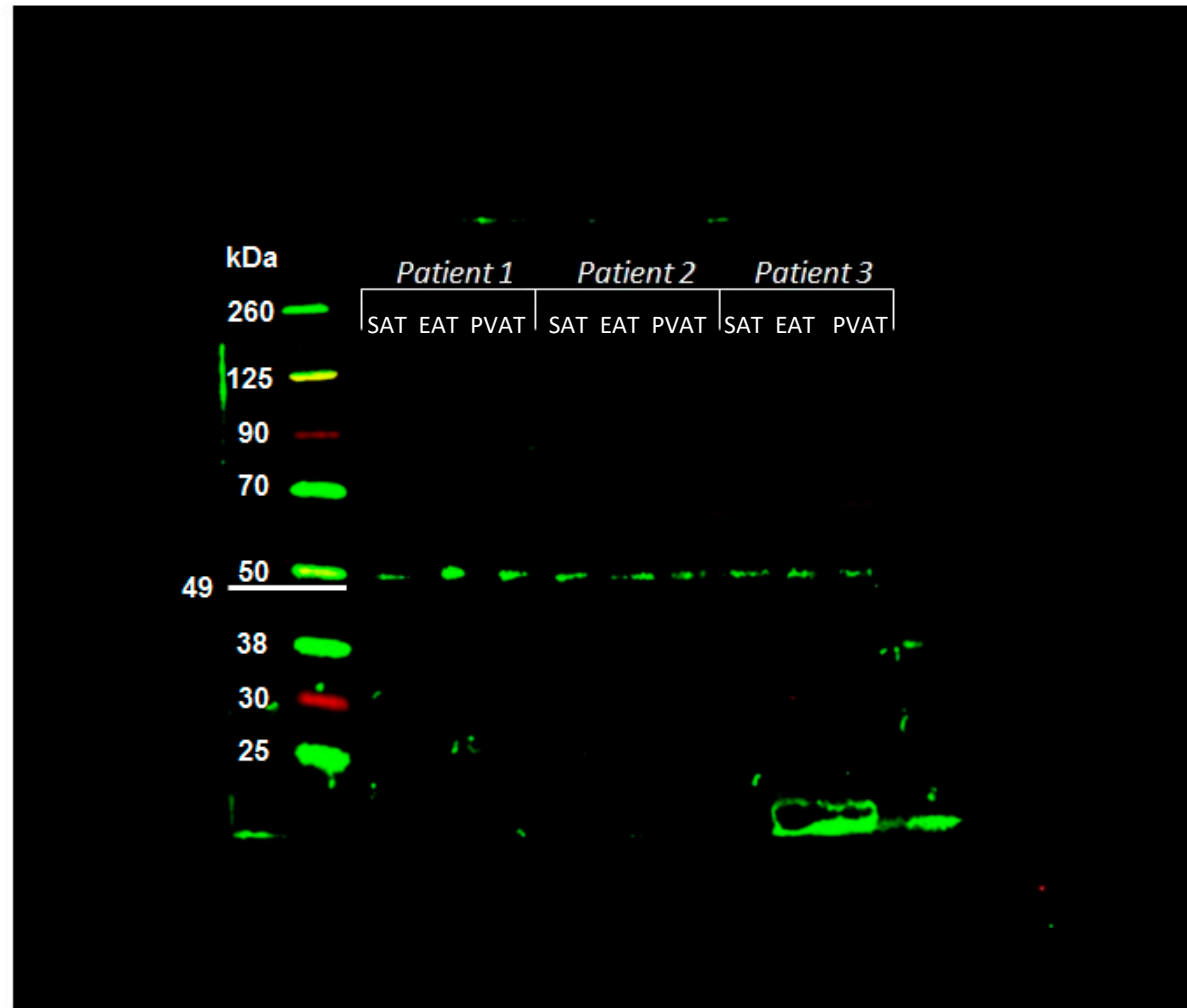



**Supplementary Figure S17.** Uncropped Western blot of SGMS2 expression in subcutaneous adipose tissue (SAT), epicardial adipose tissue (EAT), and perivascular adipose tissue (PVAT) in patients with coronary artery disease (CAD)

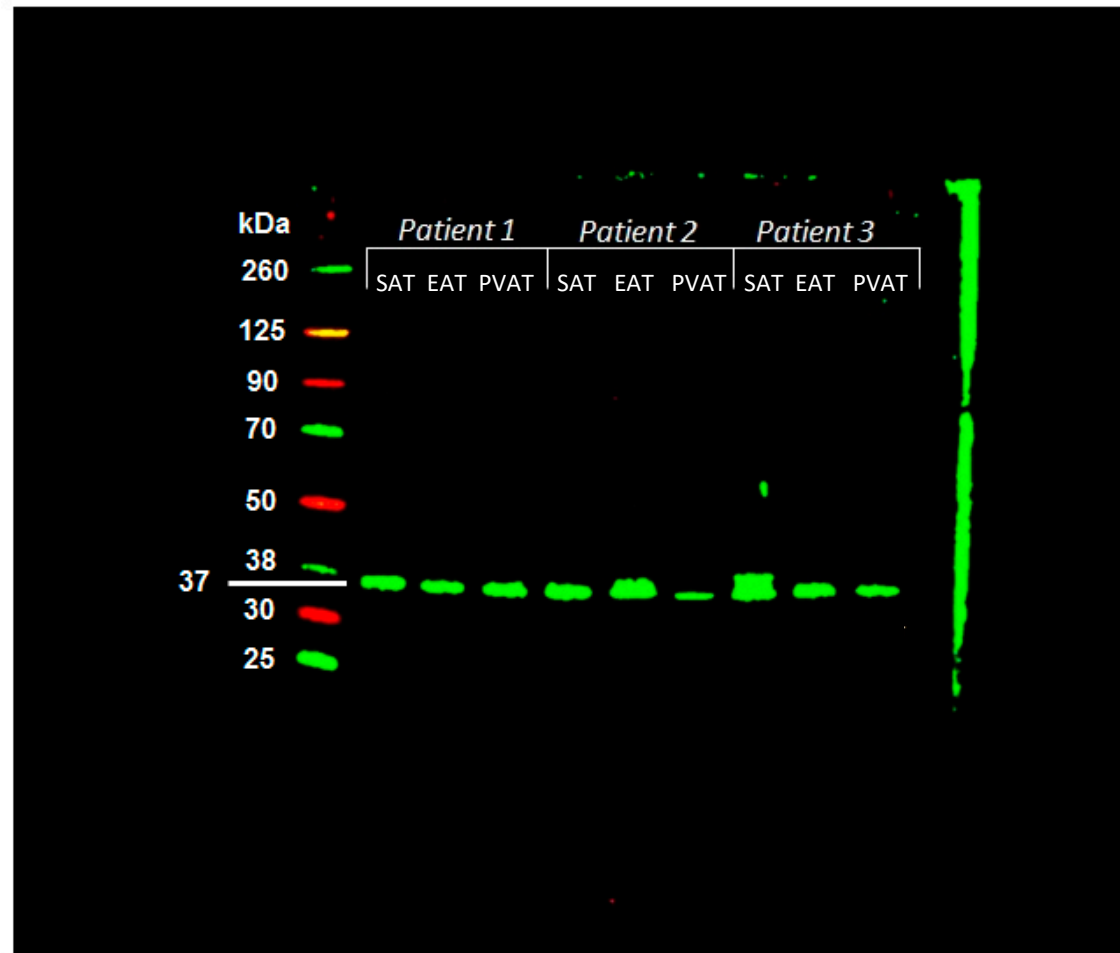

**Supplementary Figure S18.** Uncropped Western blot of SGMS2 expression in subcutaneous adipose tissue (SAT), epicardial adipose tissue (EAT), and perivascular adipose tissue (PVAT) in patients with valvular heart disease (VHD)

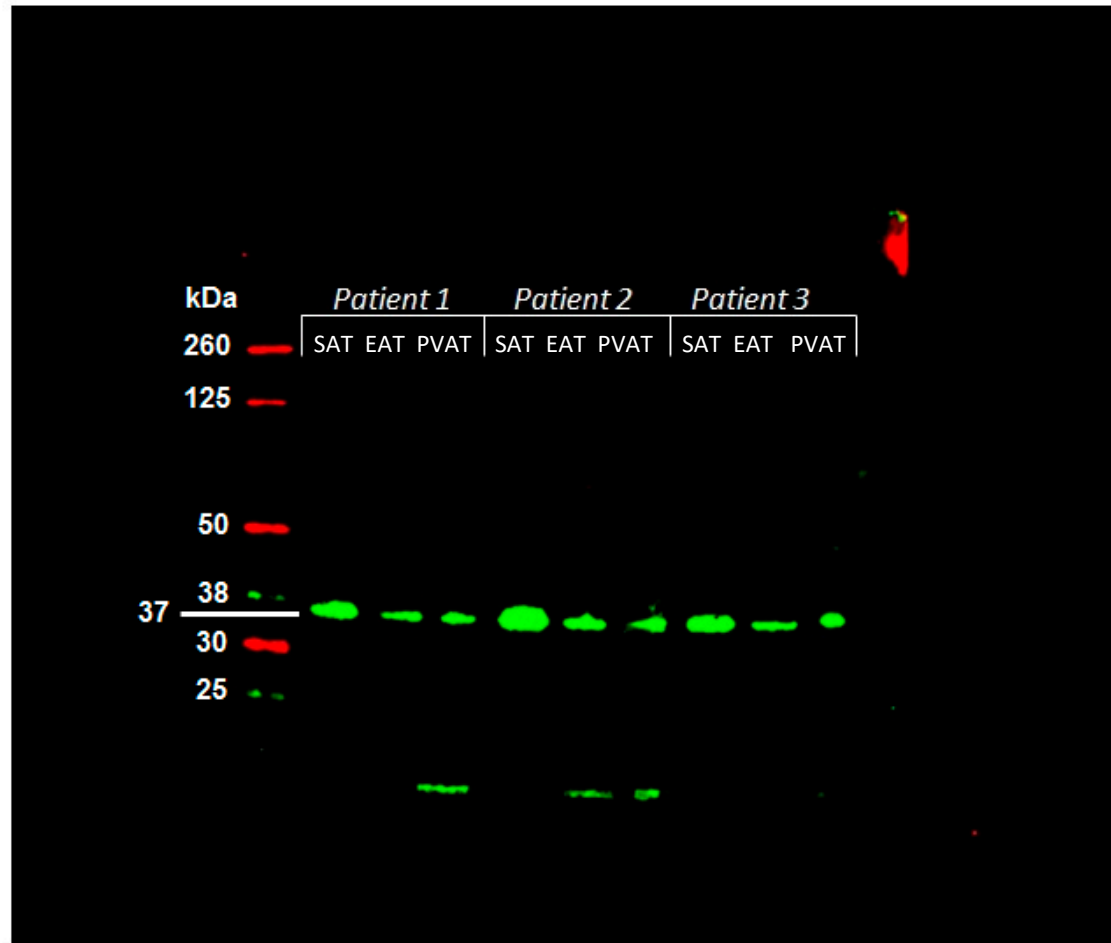

Supplement: s1 [file s1]
